# Supplementary material
Source: HighWire-hosted journal article supplement (https://www.cmajopen.ca/content/suppl/2021/12/14/9.4.E1181)
Supplement: open-2021-0173-original-submission.pdf [file open-2021-0173-original-submission.pdf]

**The impact of regulatory discussion on low-dose codeine purchasing in Canada:  
time series analysis**

Charlotte G. Boone

Tony Antoniou, PhD

David N. Juurlink, MD, PhD

Teagan Rolf von den Baumen, BSc

Sophie A. Kitchen, MSc

Georgia C. Richards, BSc (Hons I)

Mina Tadrous, PharmD PhD

Tara Gomes, PhD

**Affiliations:** Li Ka Shing Knowledge Institute, St. Michael's Hospital (TA, SAK, TG); ICES (DNJ, MT, TG); Institute for Health Policy, Management, and Evaluation, Nuffield Department of Primary Care Health Sciences, University of Oxford (GR); University of Toronto (CGB, TRB, TG); Women's College Hospital, Toronto, Ontario (MT).

**Short Title:** Low-dose codeine purchasing in Canada

**Corresponding Author:**

Tara Gomes

30 Bond St.

Toronto, Ontario M5B 1W8

tara.gomes@unityhealth.to

Phone: 416-864-6060 x77046

Fax: 416-864-5978

**Total Word Count:** 2098

**Keywords:** Addiction Medicine, Drugs, Health Policy, Pain, Pharmacy, Opioids, Codeine.

1  
2  
3  
4  
5  
6  
7  
8  
9  
10  
11  
12  
13  
14  
15  
16  
17  
18  
19  
20  
21  
22  
23  
24  
25  
26  
27  
28  
29  
30  
31  
32  
33  
34  
35  
36  
37  
38  
39  
40  
41  
42  
43  
44  
45  
46  
47  
48  
49  
50  
51  
52  
53  
54  
55  
56  
57  
58  
59  
60

**ABSTRACT**

**Background:** Low-dose codeine products can be purchased without a prescription in most of Canada, despite ongoing regulatory discussions regarding their potential rescheduling. Due to their over-the-counter (OTC) status, little is known about the amount of these products sold across the country.

**Methods:** We examined population-adjusted monthly purchasing of codeine products from January 2014 to October 2019 using the IQVIA Canadian Drug Store and Hospital Purchases Audit (CDH) database, stratified by province and OTC status. We used interventional autoregressive integrated moving average models to examine the impact of communications by regulators and a Manitoba rescheduling policy on these patterns.

**Results:** Over the study period, 24,120 kilograms of codeine (3.025 billion units) and 937,867kg of acetaminophen were sold through OTC low-dose codeine products across Canada. Health Canada’s 2016 announcement of proposed regulatory change did not significantly impact OTC codeine purchasing ( $p=0.57$ ). However, initiation of a 60-day public comment period in September 2017 was associated with a roughly 44% decrease in OTC codeine purchasing ( $p=0.03$ ). In Manitoba, there was a dramatic decrease in the purchasing of the same codeine formulations after rescheduling in February 2016 ( $p<0.001$ ). We observed no significant change in the rate of purchasing of higher dose codeine formulations in response to scheduling changes in Manitoba ( $p=0.22$ ).

**Conclusions:** More than half a billion OTC codeine tablets are purchased in Canada each year. Given the potential risks of codeine dependence and acetaminophen toxicity

1 with these products, and the impacts of Manitoba's rescheduling in 2016, a national  
2  
3 rescheduling strategy should be considered.  
4  
5  
6  
7  
8  
9  
10  
11  
12  
13  
14  
15  
16  
17  
18  
19  
20  
21  
22  
23  
24  
25  
26  
27  
28  
29  
30  
31  
32  
33  
34  
35  
36  
37  
38  
39  
40  
41  
42  
43  
44  
45  
46  
47  
48  
49  
50  
51  
52  
53  
54  
55  
56  
57  
58  
59  
60

Confidential

**BACKGROUND**

**Introduction:**

In Canada, the opioid crisis has affected every region of the country[1]. Recently, all provinces (excluding Quebec) have made efforts to monitor opioid prescribing through implementation of prescription monitoring programs[2-4]. However, over-the-counter (OTC) low-dose codeine purchases are not accounted for in these systems. While codeine is prescription-only in many countries, lower strengths are available OTC in others, including the United Kingdom, Canada, and Ireland[5]. The accessibility of OTC codeine formulations reinforces the perception of safety that can contribute to hazardous use[6], dependence[5, 7], and other harms, including from the ASA or acetaminophen with which it is combined[7, 8].

In Canada, *The Controlled Drugs and Substances Act* defines OTC (Schedule II) codeine preparations as those containing not more than 8 mg or its equivalent of codeine phosphate per unit of solid form or not more than 20 mg codeine phosphate per 30 mL liquid preparation[9]. Additionally, these products must contain two or more additional medicinal ingredients of specified quantities[9]. The most commonly sold OTC codeine preparations in Canada contain codeine, acetaminophen and caffeine. While intended to prevent inappropriate use, the requirement for OTC codeine products to be combined with other medicinal ingredients places consumers at risk of toxicity from these drugs in addition to opioid-related harm[8, 10], particularly hepatotoxicity caused by acetaminophen[11, 12].

In Canada, the federal government is responsible for determining the conditions of sale of drug products, such as the requirement for a prescription. Following this, provincial and territorial governments can further specify additional conditions of sale,

but those conditions must be more restrictive than federal legislation[13]. On February 1, 2016, the College of Pharmacists of Manitoba mandated that all low-dose codeine preparations previously considered OTC would require a prescription by either a pharmacist or other prescriber[14]. Similar regulations have been proposed on a provincial[15] and national[16] level, and are supported by professional pharmacy and medical associations[17, 18].

In July 2016, Canada's Minister of Health proposed regulatory changes that would require a prescription for low-dose codeine products, and in September 2017, the Canadian Department of Health opened a 60-day comment period for the proposed regulatory change[16]. Changes to the scheduling of OTC codeine products are still being proposed, with ongoing consultations involving stakeholders[19].

In order to limit the risk of harm from these products, it is important to understand the volume of products being sold across the country and the impacts, if any, of restrictions or proposed rescheduling on their sale. We examined trends in the purchasing of low-dose codeine products across Canada from 2014 to 2019, evaluating the impact of federal regulatory proposals on these patterns of use as well as the impact of Manitoba's 2016 policy change requiring a prescription for these products.

## **METHODS**

### **Setting**

We conducted a population-based time series analysis of low-dose codeine purchasing by pharmacies and hospitals across Canadian provinces from January 1<sup>st</sup>, 2014 to October 31<sup>st</sup>, 2019. Data regarding codeine consumption in the Canadian

territories were not available for this analysis. Due to the aggregate nature of the source data, research ethics approval was not required.

**Data Sources**

We used the IQVIA Canadian Drug Store and Hospital Purchases Audit (CDH) database during the study period. Sampling is based on a projected audit, covering over one-third of retail pharmacies and 88% of hospitals, with data subsequently stratified by size and region and then projected to determine total purchasing[20]. We used Statistics Canada annual population estimates to generate population-adjusted purchasing rates in each province[21].

**Outcomes**

Our primary outcomes were the impact of i) the federal regulatory proposal regarding a change to prescription-only status and ii) the subsequent 60-day period of public comment on the monthly volume of low-dose codeine purchased across Canadian provinces. For this analysis, we excluded data from Manitoba because low-dose codeine products were rescheduled as prescription only during the study period. The volume of low-dose codeine “units” dispensed allowed for standardization between liquid and solid dosage forms. We defined one unit as 8 milligrams of codeine, the standard dose in one OTC tablet.

In a secondary analysis, we investigated the impact of Manitoba’s February 2016 policy change requiring a prescription for low-dose codeine. We examined several measures, including the monthly purchasing volume of low-dose codeine, of higher-dose codeine products (which have always required a prescription), and of all codeine strengths combined. We sought to determine whether restrictions the sale of OTC

codeine products was associated with a compensatory increase in the use of higher-dose codeine products.

## Statistical Analysis

We used interventional autoregressive integrated moving average (ARIMA) models to examine the impact of regulatory proposals and policy changes on monthly purchasing of codeine at a population-adjusted rate in Canadian provinces. We differenced the time series and used the augmented Dickey-Fuller test to confirm stationarity. We selected model parameters using the residual autocorrelation function (ACF), partial autocorrelation function (PACF), and inverse autocorrelation function (IACF) correlograms. We chose the final model using the autocorrelation plots, the Ljung-Box chi-square test for white noise, and R-squared estimate of fit. In the primary analysis, we modeled Health Canada's proposed regulatory changes (July 2016) and the opening of the 60-day comment period on these regulatory changes (September 2017) as ramp functions to test for gradual changes in trends.

In our secondary analysis of codeine purchasing in Manitoba, we analyzed the impact of the February 2016 scheduling change on monthly sales of codeine-containing product. In separate models, we used a step intervention function to test for an immediate change in total codeine purchasing, a step intervention function to test for an immediate change in low-dose codeine purchasing, and a ramp intervention function to test for a gradual slope change in purchasing of higher-dose codeine products. All analyses were completed using SAS Enterprise Guide version 9.4 (SAS Institute, Cary, NC) and the SAS/ETS Time Series Forecasting System.

## RESULTS

1 Over the study period, 24,120 kilograms of codeine (3.025 billion units) together  
2  
3 with 937,867 kilograms of acetaminophen were sold as OTC low-dose codeine products  
4  
5 across Canadian provinces. After population-adjustment, this amounts to approximately  
6  
7 88 codeine tablets dispensed OTC for every resident of Canadian provinces over a period  
8  
9 of approximately 5 years.  
10  
11  
12  
13  
14

15 **Impact of selected opioid policies and interventions**

16  
17 In our primary analysis of low-dose codeine purchasing across Canada, we found  
18  
19 that the proposed regulatory change announced in 2016 did not significantly impact low-  
20  
21 dose codeine purchasing ( $p=0.574$ ). In contrast, the subsequent announcement of a 60-  
22  
23 day comment period in September 2017 was associated with a 43.5% decrease in low-  
24  
25 dose codeine purchasing (from 1.38 to 0.78 units per resident between August 2017 and  
26  
27 October 2019;  $p=0.03$ ) (**Figure 1**).  
28  
29  
30

31 In the secondary analysis of Manitoba trends, the February 2016 policy change  
32  
33 was associated with an immediate 92% reduction in purchasing of low-dose codeine  
34  
35 products (from 3.50 to 0.27 units per resident between January 2016 and February 2016;  
36  
37  $p<0.001$ ) (**Figure 1**). The scheduling change was not associated with compensatory  
38  
39 changes in purchasing of higher-dose prescription codeine formulations ( $p=0.22$ ;  
40  
41  
42

43 **Supplementary Appendix**).  
44  
45  
46

47 **Cross-provincial comparison of low-dose codeine purchasing**

48  
49 In the final year of our study period (November 1, 2018 to October 31, 2019),  
50  
51 375,847,016 units of low-dose codeine preparations were sold across Canada,  
52  
53 representing 3,007 kilograms of codeine and 114,703 kilograms of acetaminophen. In  
54  
55 Manitoba, where codeine products were only available with a prescription over the last  
56  
57  
58  
59  
60



year of our study period, low-dose products accounted for 3.3% of all codeine sold by weight, compared to 21.7% in all other Canadian provinces where low-dose codeine products remained available for over-the-counter sale (**Table 1**). We identified considerable inter-provincial variability in the rate of OTC codeine purchasing. The annual rate of OTC codeine purchasing ranged from 1.6 units per person in Quebec to 17.3 units per person in British Columbia. The percentage of codeine attributable to low-dose preparations also varied by province, from 6.9% of all codeine purchased in Alberta to 44.6% of all codeine purchased in Ontario.

## DISCUSSION

In this population-based study, we found that more than 375 million low-dose codeine tablets were dispensed without a prescription in Canada in the most recent 1-year period of 2018/2019. This approximates 10 tablets sold for every resident within Canada's provinces. Over one-fifth of all codeine dispensed (by weight) in the Canadian provinces was sold without a prescription. Interestingly, although the announcement regarding proposed national regulatory changes to OTC codeine products had no impact on OTC codeine accessibility, the initiation of a public commenting period was associated with reduced purchasing. In addition, rescheduling of low-dose codeine products in Manitoba was associated with an immediate and striking decrease in the total volume of these products sold, with no compensatory increase in higher-dose prescription codeine purchasing, and a significant decrease in the volume of codeine purchased overall. This demonstrates the potential impact of rescheduling if applied nationally in Canada.

The decrease in codeine purchasing observed following the opening of a comment period suggests that the engagement of stakeholders in regulatory discussion influenced

1 consumption trends. This may indicate that media coverage and communication to  
2  
3 clinicians regarding the potential regulatory changes increased public awareness of the  
4  
5 potential risks of codeine and may have influenced consumption trends and pharmacist  
6  
7 counselling recommendations. This finding of reduced sales of low-dose codeine  
8  
9 products is suggestive of a therapeutic area in which consumers and healthcare providers  
10  
11 are willing to consider alternative therapies. Ongoing policy discussions should consider  
12  
13 this as an indication of the ability for pharmacists and patients to adapt to changing  
14  
15 regulation around these products if introduced nationally.  
16  
17  
18

19  
20 This is further reinforced by our findings in Manitoba, which are consistent with a  
21  
22 study evaluating the 2018 rescheduling of low-dose codeine in Australia[22]. In both of  
23  
24 these studies, purchasing of low-dose codeine preparations declined immediately  
25  
26 following the policy change with no compensatory change in purchasing of high-dose  
27  
28 formulations. The consistency of these findings suggests that rescheduling low-dose  
29  
30 codeine preparations may reduce potentially inappropriate or unsafe use of these products  
31  
32 without shifts in treatment towards higher strength alternatives.  
33  
34  
35

36 Although Canadian data are lacking, treatment of acute and chronic pain is likely  
37  
38 the principal reason for seeking over-the-counter codeine products. This assertion is  
39  
40 supported by studies finding that 34% to 70% of individuals cite pain control as the  
41  
42 principal reason for using these products in survey studies conducted in Australia and the  
43  
44 UK, respectively[23, 24]. Accordingly, gaps in access to pain management modalities is a  
45  
46 possible unintended consequence OTC codeine rescheduling and a corresponding shift to  
47  
48 other, potentially less safe alternatives.  
49  
50  
51

52 In Australia, the rescheduling of codeine products led to significant increases in  
53  
54 non-opioid OTC analgesic use[25], suggesting that in some patients, safer approaches  
55  
56 were used to manage pain. However, more data are needed to determine whether chronic  
57  
58  
59  
60

1 pain patients previously accessing OTC codeine were able to successfully manage their  
2  
3 pain with non-opioid analgesics, or whether they transitioned to more potent opioids.  
4

5  
6 Our study has several limitations. First, the data represents codeine purchasing by  
7  
8 pharmacies, and may not be reflective of consumption patterns as products may expire  
9  
10 and be discarded, or be purchased by an individual and not completely consumed.  
11  
12 However, pharmaceutical purchasing analysis methods are often used in antimicrobial  
13  
14 stewardship analyses as they strongly correlate with consumption patterns[26], and such  
15  
16 data are likely to provide an estimate of community consumption. Finally, we could not  
17  
18 determine whether the rescheduling of low-dose codeine in Manitoba led to adverse  
19  
20 patient outcomes, including opioid withdrawal, use of illicit opioids, or adverse outcomes  
21  
22 from increased use of alternative analgesics. Future research is needed to further explore  
23  
24 the impacts of this policy change.  
25  
26  
27  
28  
29  
30

## 31 **Conclusion**

32  
33  
34 Despite a trend towards lower use over time, the overall volume of low-dose codeine  
35  
36 purchasing by pharmacies remains high, with an annual rate of 10 tablets being purchased  
37  
38 by pharmacies for every resident of Canadian provinces in 2019. Despite a lack of a  
39  
40 national regulatory change, Manitoba's rescheduling of these products in 2016  
41  
42 demonstrates the potential for rapid, large decreases in low-dose codeine purchasing  
43  
44 across Canada if such a change was implemented. Given the risks of medication-related  
45  
46 harm and dependence associated with low-dose codeine products, there is an opportunity  
47  
48 for federal regulatory changes to improve medication safety across Canada.  
49  
50  
51  
52  
53  
54  
55

## 56 **ACKNOWLEDGMENTS**

We thank IQVIA for the use of their Canadian Drugstore and Hospital Purchase Audit.

**FUNDING SOURCES**

This study was funded by grants from the Ontario Ministry of Health and the Canadian Institutes for Health Research.

**DISCLOSURES**

The statements, findings, conclusions, views, and opinions expressed in this report are based in part on data obtained under license from IQVIA Solutions Canada Inc. concerning the following information service(s): CDH, data period November 1st, 2013, to October 31st, 2019. All Rights Reserved. The statements, findings, conclusions, views, and opinions expressed herein are not necessarily those of IQVIA Inc. or any of its affiliated or subsidiary entities.

**REFERENCES**

1. Belzak, L. and J. Halverson, *The opioid crisis in Canada: a national perspective*. Health Promot Chronic Dis Prev Can, 2018. **38**(6): p. 224-233.
2. Gomes, T., et al., *Impact of legislation and a prescription monitoring program on the prevalence of potentially inappropriate prescriptions for monitored drugs in Ontario: a time series analysis*. CMAJ Open, 2014. **2**(4): p. E256-61.
3. Nova Scotia College of Pharmacists, *Position Statement: Sale of Exempted Codeine Preparations*. 2015.
4. Sproule, B., *Prescription Monitoring Programs in Canada: Best Practice and Program Review*. 2015, Canadian Centre on Substance Abuse: Ottawa, ON.

- Comparing treatment-seeking codeine  
in a novel case series. Drug Alcohol  
Canada, Narcotic Control Regulations.  
cross-sectional analysis of over-the-c  
le of people who regularly inject dru

14. Zlomislic, D. and J. Yang, *Manitoba sets new rule banning non-prescription codeine*, in *The Toronto Star*. 2016: Toronto.

15. Saskatchewan College of Pharmacy Professionals, *Memorandum RE: Exempted Codeine Products (ECPs): Proposed Regulatory Bylaw Amendments: Stakeholder Consultation*, K. Samoila, Editor. 2018: Regina, SK.

16. Controlled Substances Directorate, M.B., *Controlled Drug and Substances Act: Notice to interested parties - Non-prescription availability of low-dose codeine products*, in *Canada Gazette Government Notices*. Department of Health: Ottawa, ON.

17. Canadian Medical Association, *CMA Submission: Non-prescription Availability of Low-Dose Codeine Products*. 2017.

18. Krawchenko, I., *Canadian Pharmacists Association submission re: non-prescription availability of low-dose codeine products*. 2017.

19. Canada, G.o., *Forward Regulatory Plan 2019-2021: Regulations Amending the Narcotic Control Regulations under the Controlled Drugs and Substances Act to make all products containing codeine available by prescription only while ensuring access to these medications*. 2019: Ottawa.

20. Gaudet, J., *Data Citation of The Canadian Drug Store and Hospital Purchase Audit*, C. Boone, Editor. 2020.

21. *Annual Demographic Estimates: Canada, Provinces and Territories*. 2014-2019, Statistics Canada.

22. Cairns, R., et al., *Codeine use and harms in Australia: evaluating the effects of re-scheduling*. *Addiction*, 2020. **115**(3): p. 451-459.

- 1 23. Nielsen, S., J. Cameron, and N. Lee, *Characteristics of a nontreatment-seeking*  
2  
3 *sample of over-the-counter codeine users: implications for intervention and*  
4  
5 *prevention*. J Opioid Manag, 2011. 7(5): p. 363-70.  
6  
7
- 8 24. Wells, J., et al., *Purchasing Over The Counter (OTC) Medicinal Products*  
9  
10 *Containing Codeine - Easy Access, Advertising, Misuse and Perceptions of*  
11  
12 *Medicinal Risk*. Journal of Pharmacy and Pharmaceutical Sciences, 2018. 21(1):  
13  
14 p. 286-295.  
15  
16
- 17 25. Andrea L Schaffer, R.C., Jared A Brown, Natasa Gisev, Nicholas A Buckley and  
18  
19 Sallie-Anne Pearson, *Changes in sales of analgesics to pharmacies after codeine*  
20  
21 *was rescheduled as a prescription only medicine*. The Medical Journal of  
22  
23 Australia, 2020. 212(7): p. 321-327.  
24  
25
- 26 26. Tan, C., et al., *Validating hospital antibiotic purchasing data as a metric of*  
27  
28 *inpatient antibiotic use*. The Journal of antimicrobial chemotherapy, 2016. 71(2):  
29  
30 p. 547-553.  
31  
32  
33  
34  
35  
36  
37  
38  
39  
40  
41  
42  
43  
44  
45  
46  
47  
48  
49  
50  
51  
52  
53  
54  
55  
56  
57  
58  
59  
60

1  
2  
3  
4  
5  
6  
7  
8  
9  
10  
11  
12  
13  
14  
15  
16  
17  
18  
19  
20  
21  
22  
23  
24  
25  
26  
27  
28  
29  
30  
31  
32  
33  
34  
35  
36  
37  
38  
39  
40  
41  
42  
43  
44  
45  
46  
47  
48  
49  
50  
51  
52  
53  
54  
55  
56  
57  
58  
59  
60

Confidential



## TABLES and FIGURES

Table 1: Descriptive characteristics for provincial low-dose codeine product sales between November 2018 and October 2019

| Province             | Units of Codeine (8mg) |                           |                                 | Codeine sales |                        | Acetaminophen sales |                        |
|----------------------|------------------------|---------------------------|---------------------------------|---------------|------------------------|---------------------|------------------------|
|                      | Number of Units (N)    | Rate (units per resident) | %* of total codeine sold as OTC | Kilograms     | Rate (mg per resident) | Kilograms           | Rate (mg per resident) |
| Alberta              | 17,688,955             | 4                         | 7                               | 142           | 32                     | 5,375               | 1,230                  |
| British Columbia     | 89,681,975             | 18                        | 38                              | 718           | 142                    | 26,500              | 5,225                  |
| Manitoba             | 2,175,128              | 12                        | 3                               | 17            | 13                     | 753                 | 550                    |
| New Brunswick        | 5,836,590              | 8                         | 22                              | 47            | 60                     | 1,788               | 2,301                  |
| Nova Scotia          | 14,369,659             | 15                        | 41                              | 115           | 118                    | 4,462               | 4,594                  |
| Ontario              | 225,685,892            | 16                        | 45                              | 1,806         | 124                    | 69,698              | 4,785                  |
| PEI and NFLD         | 3,853,873              | 6                         | 12                              | 31            | 45                     | 1,443               | 2,127                  |
| Quebec               | 13,570,422             | 2                         | 19                              | 109           | 13                     | 3,730               | 440                    |
| Saskatchewan         | 2,984,521              | 3                         | 9                               | 24            | 20                     | 954                 | 813                    |
| <b>All Provinces</b> | <b>375,847,016</b>     | <b>10</b>                 | <b>22</b>                       | <b>3,007</b>  | <b>80</b>              | <b>114,703</b>      | <b>2,452</b>           |

\*reported as a percent of total mass of codeine sold

**Figure 1.** Low-dose codeine purchasing (units per resident) among Canadian Provinces  
from January 2014 to October 2019

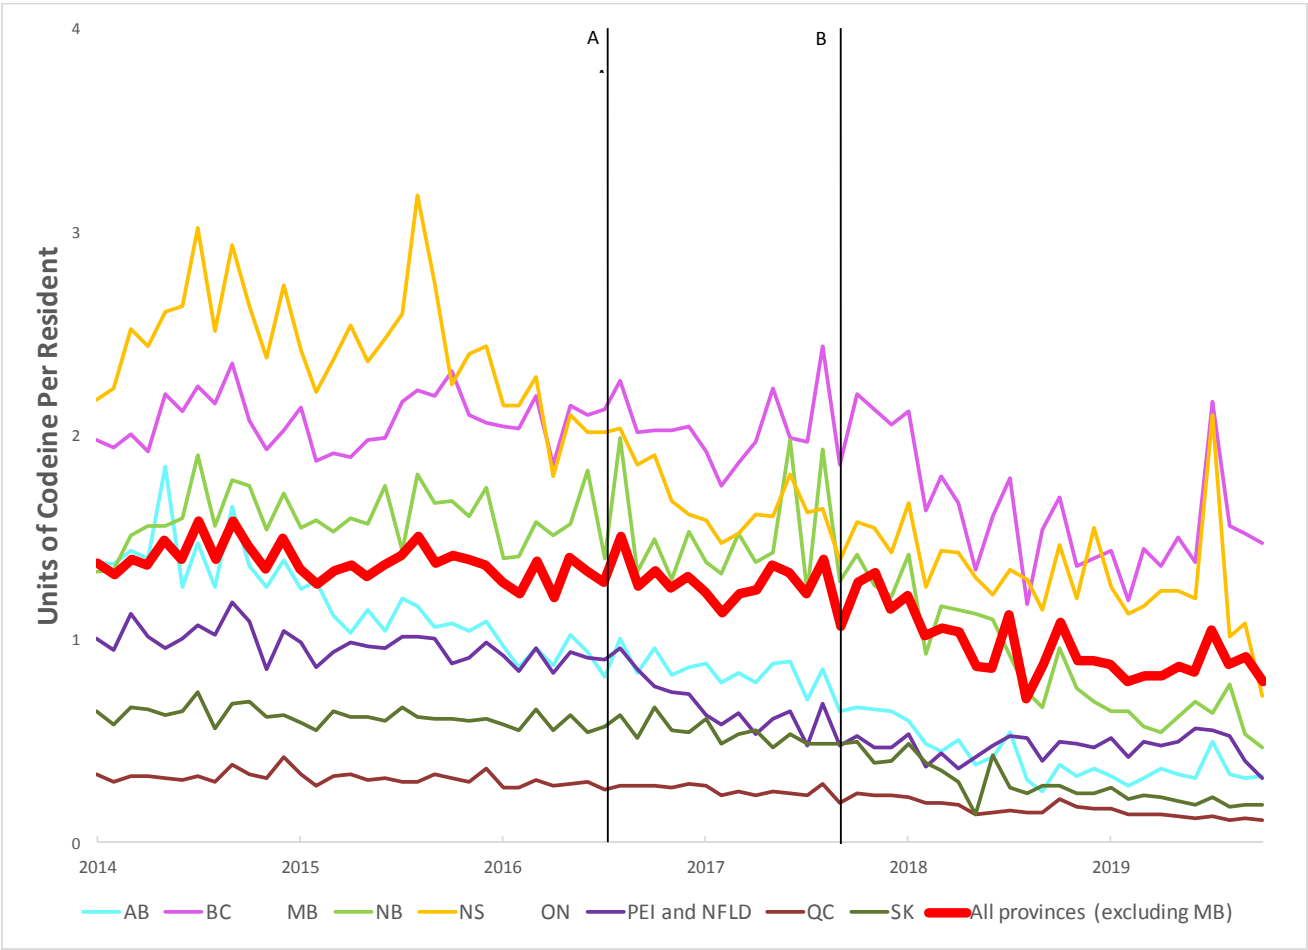

Vertical bars indicate policy changes which were modelled to assess for their impact on overall sale trends where:

A = Canadian proposal of regulatory changes: July 17<sup>th</sup>, 2016

B = Canadian Department of Health 60-day commenting period opens: September 9<sup>th</sup>, 2017

**Figure 2.** Codeine purchasing (OTC and prescription strength) in Manitoba from January 2014 to October 2019

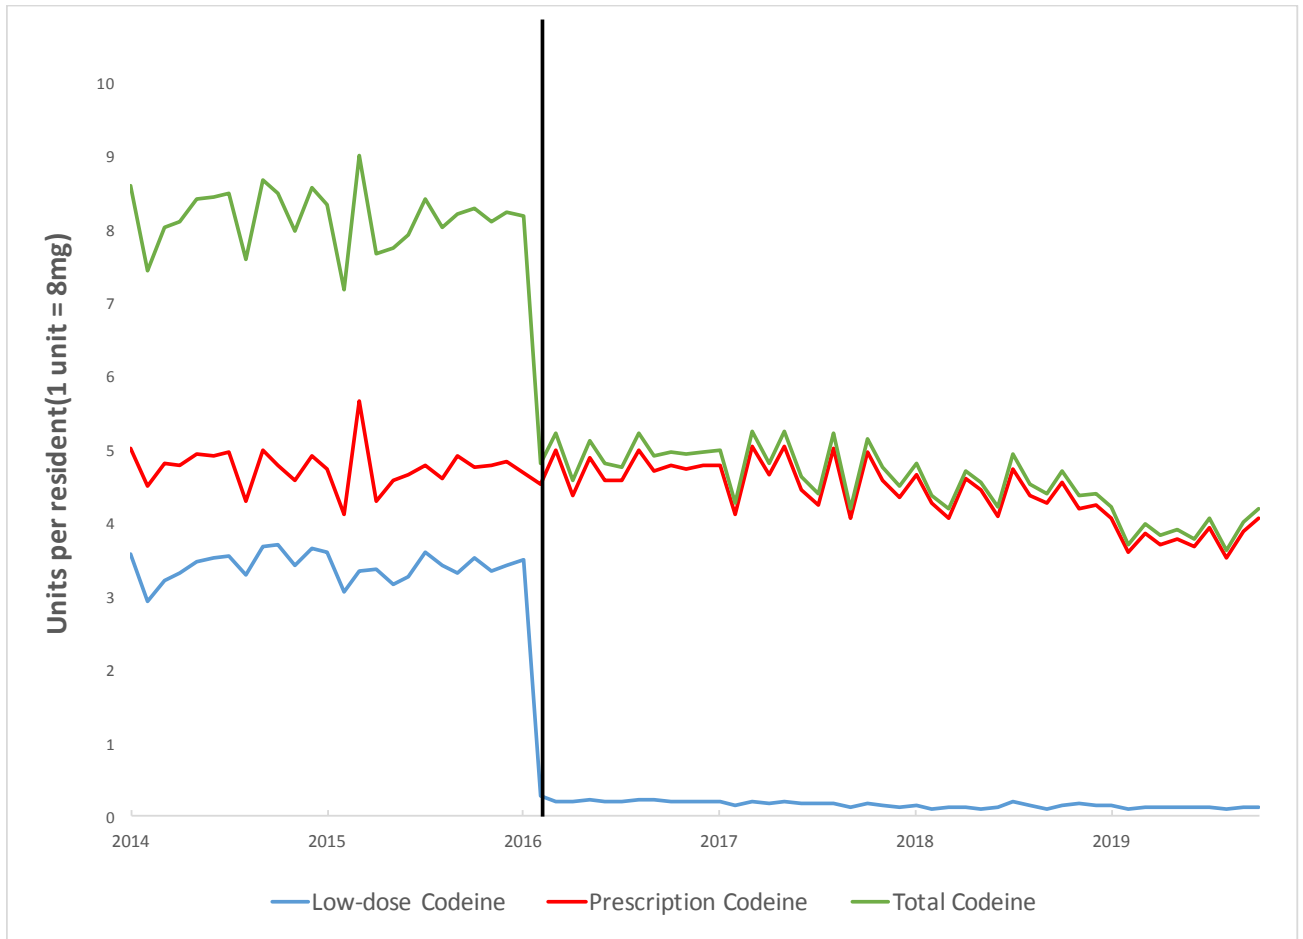

Vertical bar indicates policy change to require a prescription for all codeine products regardless of strength
